# Supplementary material for: Fluid Flow Mechanical Stimulation-Assisted Cartridge Device for the Osteogenic Differentiation of Human Mesenchymal Stem Cells
Source: MDPI journal article supplement (doi:10.3390/mi12080927), 2021-08-03
Supplement: s1 [file s1]

# Fluid flow mechanical stimulation-assisted cartridge device for the osteogenic differentiation of human mesenchymal stem cells

Ki-Taek Lim , Dinesh-K. Patel , Sayan-Deb Dutta and Keya Ganguly

**Figure(s):**

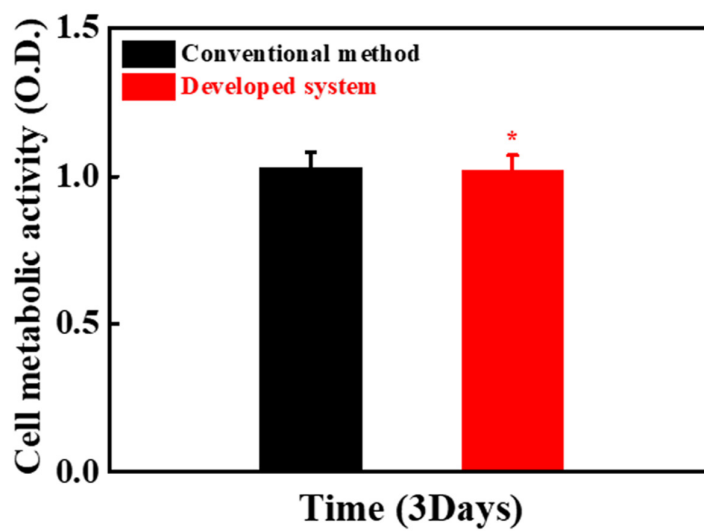

---

**Figure S1.** Comparative study of hMSCs viability between the conventional method (incubated at 5% CO<sub>2</sub> incubator), and the developed system (static condition) after 3 days.
